# Supplementary material for: Evaluating the planning for and distribution of cholera rapid diagnostic tests in Nepal
Source: Research Square preprint supplement (doi:10.21203/rs.3.rs-7594652/v1), 2025-09-24
Supplement: Supplementary file 2 [file c579472b071e463e0fa64acc.pdf]

# **In-Depth Interview Guide for Medical Recorders on Cholera RDTs in Nepal**

## Introduction

- Introduce yourself and the purpose of the interview.
- Review the consent form for the interview and obtain a signature.

## Icebreaker/Background Information

1. Can you tell me the story about how you became the medical reporter at this health facility?
  - a. Probe if not mentioned: How long have you been the medical reporter?
2. What are your main responsibilities as a medical reporter?
  - a. Probe if not mentioned: Can you tell me about the different systems that you report in? (EWARS, HMIS, others?)
  - b. How do you decide where to report information?

## Section 1: Introduction/Training on RDTs

1. How did you first hear about rapid diagnostic tests for cholera (called RDTs)?
2. How did you learn about the process for reporting cholera RDT results?
  - c. Probe: What kind of training did you receive? What kind of instructional materials did you receive?
  - d. What topics were covered in the training related to RDT reporting?
3. What did you find most helpful about the training/instruction you received?
4. What could have been improved about the training?
5. What additional training/support would have been useful?

## Section 2: Adoption and Integration of RDTs into Reporting Practice

1. How were results from cholera RDTs incorporated into your reporting procedures?
2. What challenges did you face in integrating RDTs into your reporting routines?
3. What factors facilitated the incorporation of RDT results into your reporting routines?
4. What made it difficult to incorporate RDT results into your reporting routines?

## Section 3: Compliance with RDT reporting

1. How well did the doctors in this health facility adhere to the guidelines for reporting results from cholera RDTs to you?
2. How well did the laboratory technicians in this health facility adhere to the guidelines for reporting results from cholera RDTs to you?
3. What mistakes or deviations have you observed related to cholera disease reporting?
4. How do you encourage clinicians/laboratory technicians in this facility to correctly report results?
5. What do others do to encourage you to report results? (i.e., facility in-charge, EDCC staff, etc.)

## Section 4: Reporting of Cholera Results

### Reporting Process

1. Think about the last time you received results from a cholera RDT test. Can you tell me the story of what happened?
  - a. In what ways was that case similar to what normally happens?
  - b. In what ways was that case different from what normally happens?
2. Can you describe the process that you normally follow for reporting cholera test results?  
Probe if not mentioned:
  - a. How do you get the results from the RDTs?
  - b. How long does it take you to get and report the results?
  - c. Where do you report the results? (EWARS? Other systems?)
  - d. What do you do with positive cholera RDT results?
  - e. What do you do with negative cholera RDT results?
  - f. How do you determine whether to mark the case as suspect, probable or confirmed?
  - g. How do you find out the results from the confirmatory culture tests done on positive cholera RDT samples?
  - h. What do you do with the culture results? (Probe about updating the EWARS record)
3. How does the way you report cholera results compare to reporting for other diseases?

#### *Barriers and Facilitators to Reporting*

1. What challenges have you faced in reporting cholera results?
2. What factors have helped you report cholera results?
3. In your opinion, how accurate are the results in EWARS? How accurate are the results in HMIS?

#### Section 5: Effectiveness of RDTs in Improving Cholera Case Detection and Control

1. What is the cholera data you report used for?
2. How do you think cholera RDTs have affected detection and control of cholera?
3. Can you tell me about a time when your reporting of cholera RDT results made a positive impact?

#### Conclusion

1. What could be done to improve cholera results reporting?
2. Do you have any additional comments or insights regarding the reporting of cholera RDT results?

#### Thank you

- Thank the interviewee for their time and valuable insights.
- Explain the next steps in the research process and how their input will be used.
- Ask for permission to reach out again for clarification or in case of additional questions.
